# Supplementary material for: Does energy intensity matter in the nexus between energy consumption and economic growth regarding capital-energy substitution?
Source: Research Square preprint supplement (doi:10.21203/rs.3.rs-1609008/v1), 2022-05-13
Supplement: Supplementary file 1 [file 3e179488d4be62367209da92.docx]

**APPENDIX**

| **Table 9:** Country Classification | |  | |
| --- | --- | --- | --- |
| **Low Energy Intensity** | | **High Energy Intensity** | |
| **Net Energy Exporter Countries** | **Net Energy Importer Countries** | **Net Energy Exporter Countries** | **Net Energy Importer Countries** |
| Colombia | Austria | Australia | Argentina |
| Ecuador | Brazil | Canada | Belgium |
| Egypt | Chile | Iran | Bulgaria |
| Indonesia | China, Hong Kong SAR | Kuwait | China |
| Iraq | Denmark | Malaysia | Cyprus |
| Mexico | France | Qatar | Finland |
| Norway | Germany | Saudi Arabia | Greece |
| Peru | Hungary | South Africa | Iceland |
|  | India | Trinidad & Tobago | Luxembourg |
|  | Ireland | Venezuela | Netherlands |
|  | Israel |  | New Zealand |
|  | Italy |  | Poland |
|  | Japan |  | Singapore |
|  | Morocco |  | South Korea |
|  | Philippines |  | Sweden |
|  | Portugal |  | Taiwan |
|  | Romania |  | Thailand |
|  | Spain |  | Unites States of America |
|  | Sri Lanka |  |  |
|  | Switzerland |  |  |
|  | Turkey |  |  |
|  | United Kingdom |  |  |

| **Table 10.** Descriptive Statistics of Variables (VES) | | | | | | |
| --- | --- | --- | --- | --- | --- | --- |
|  | | | **Low Energy Intensity** | | **High Energy Intensity** | |
| **Variables** | **Unit of Measurement** | **Statistics** | **[1]**  **Net Energy Exporter** | **[2]**  **Net Energy Importer** | **[3]**  **Net Energy Exporter** | **[4]**  **Net Energy Exporter** |
| Real GDP | Millions of 2011 US Dollar | Mean | 43,9275.4739 | 892048.7617 | 395983.8 | 1256206 |
| Max | 2862116.75 | 8412113 | 1629508 | 18396068 |
| Min | 28422.50781 | 30710.5781 | 8814.254 | 2996.073 |
| Std. Dev. | 541793.5296 | 1176367.139 | 394260.5 | 3229540 |
| Real TFP | Constant 2011 National Prices | Mean | 1.1077 | 0.9607 | 1.1817 | 0.9114 |
| Max | 3.1233 | 1.3164 | 5.2521 | 1.3853 |
| Min | 0.5843 | 0.5648 | 0.5724 | 0.4384 |
| Std. Dev. | 0.2953 | 0.1159 | 0.5554 | 0.1464 |
| Real Capital Stock | Millions of 2011 US Dollar | Mean | 1864804.656 | 4270330.839 | 1694198.562 | 4484390 |
| Max | 15846835 | 29931072 | 6748094.5 | 94903728 |
| Min | 90796.2188 | 110732.7344 | 42174.3515 | 17434.7 |
| Std. Dev. | 2636729.213 | 5258859.39 | 1498613.715 | 11606617 |
| Population | Millions of People | Mean | 57.4918 | 83.4246 | 21.7307 | 96.9164 |
| Max | 263.9914 | 1339.1802 | 81.1628 | 1409.517 |
| Min | 4.00803 | 3.1841 | 0.1644 | 0.2181 |
| Std. Dev. | 62.9127 | 205.4996 | 19.0147 | 278.9511 |
| Primary Energy Consumption | Million tons of oil equivalent | Mean | 46.4561 | 106.1902 | 86.4118 | 227.469 |
| Max | 188.5770 | 748.4129 | 336.9992 | 3124.862 |
| Min | 1.8354 | 1.0806 | 1.2950 | 0.7335 |
| Std. Dev. | 46.2825 | 135.1136 | 84.9547 | 569.2807 |
| Human Capital Index | Greater Than 1 | Mean | 2.2538 | 2.6896 | 2.4090 | 2.7891 |
| Max | 3.6431 | 3.8071 | 3.70629 | 3.9742 |
| Min | 1.1461 | 1.1224 | 1.1584 | 1.4957 |
| Std. Dev. | 0.5524 | 0.6266 | 0.6356 | 0.4796 |
| Human Capital Adjusted Labor* |  | Mean | 123.7230 | 180.7671 | 51.8072 | 233.1321 |
| Max | 611.4409 | 2844.1777 | 196.7272 | 3617.424 |
| Min | 11.5756 | 7.9549 | 0.2699 | 0.5023 |
| Std. Dev. | 140.2180 | 372.7156 | 44.0920 | 615.0471 |
| Number of Observations |  |  | 344 | 946 | 430 | 774 |
| Number of |  |  | 8 | 22 | 10 | 18 |
| Note: GDP indicates gross domestic product. TFP indicates total factor productivity. Std. Dev. is the abbreviation of standard deviation. Max. is the maximum value. Min. is the minimum value. Obs. means the number of observation. | | | | | | |

| **Table 11.** Descriptive Statistics of Variables (PSTR) | | | | | |
| --- | --- | --- | --- | --- | --- |
|  | Mean | Std. Dev. | Max. | Min. | Obs. |
| **Low Energy Intensity and Net Energy Exporter** |  |  |  |  |  |
| LnperGDP | 8.9191 | 0.8332 | 11.0630 | 7.1017 | 344 |
| LnperET | -0.0780 | 0.9754 | 2.3614 | -2.2591 | 344 |
| Intensity | 0.0940 | 0.0398 | 0.3815 | 0.0365 | 344 |
| **Low Energy Intensity and Net Energy Importer** |  |  |  |  |  |
| LnperGDP | 9.6202 | 0.9059 | 11.2023 | 6.9294 | 946 |
| LnperET | 0.5160 | 1,0081 | 1.5678 | -2.5606 | 946 |
| Intensity | 0.1048 | 0.0391 | 0.2924 | 0.0241 | 946 |
| **High Energy Intensity and Net Energy Exporter** |  |  |  |  |  |
| LnperGDP | 9.8767 | 0.8167 | 11.9412 | 7.8116 | 430 |
| LnperET | 1.5296 | 0.8423 | 3.3060 | -0.9057 | 430 |
| Intensity | 0.1857 | 0.0958 | 0.5030 | 0.0342 | 430 |
| **High Energy Intensity and Net Energy Importer** |  |  |  |  |  |
| LnperGDP | 9.8695 | 0.8090 | 11.5077 | 7.3331 | 774 |
| LnperET | 1.2538 | 0.8005 | 2.7623 | -1.5032 | 774 |
| Intensity | 0.1896 | 0.0715 | 0.5070 | 0.0687 | 774 |
| Note: GDP indicates gross domestic product. Std. Dev. is the abbreviation of standard deviation. Max. is the maximum value. Min. is the minimum value. Obs. means the number of observation. | | | | | |

| **Table 12. Elasticity of Substitution by Country Groups (1975-2917)** | | | | | |
| --- | --- | --- | --- | --- | --- |
|  |  | **Low Intensity** | | **High Intensity** | |
|  |  | **[1]**  **Net Energy Exporter** | **[2]**  **Net Energy Importer** | **[3]**  **Net Energy Exporter** | **[4]**  **Net Energy Importer** |
| **Raw Labor (L)** | Mean | 0.7445  (0.1634) | 0.7053  (0.1241) | 0.4871  (0.2194) | 0.6238  (0.2010) |
| Max | 0.9466 | 0.9589 | 0.8707 | 0.9673 |
| Min | -0.1131 | 0.1629 | -0.3836 | -0.0645 |
| **Adjusted Labor (HL)** | Mean | 0.7493  (0.1604) | 0.6739  (0.1374) | 0.4911  (0.2176) | 0.6370  (0.1939) |
| Max | 0.9476 | 0.9545 | 0.8718 | 0.9684 |
| Min | -0.0924 | 0.0737 | -0.3727 | -0.0270 |
|  | N | 344 | 946 | 430 | 774 |
| Note: The terms in parentheses are standard errors. N is the number of observations. . Max. is the maximum value. Min. is the minimum value. | | | | | |
